# Supplementary material for: Preservation of methylated CpG dinucleotides in human CpG islands
Source: PubMed Central journal article supplement (PMC4804638; doi:10.1186/s13062-016-0113-x), 2016-03-22

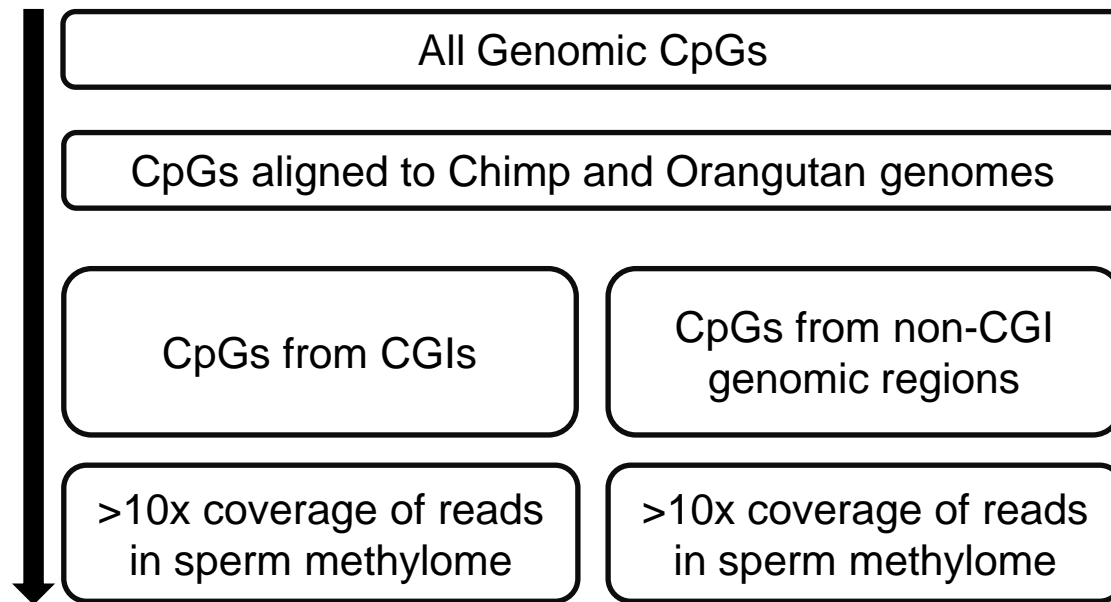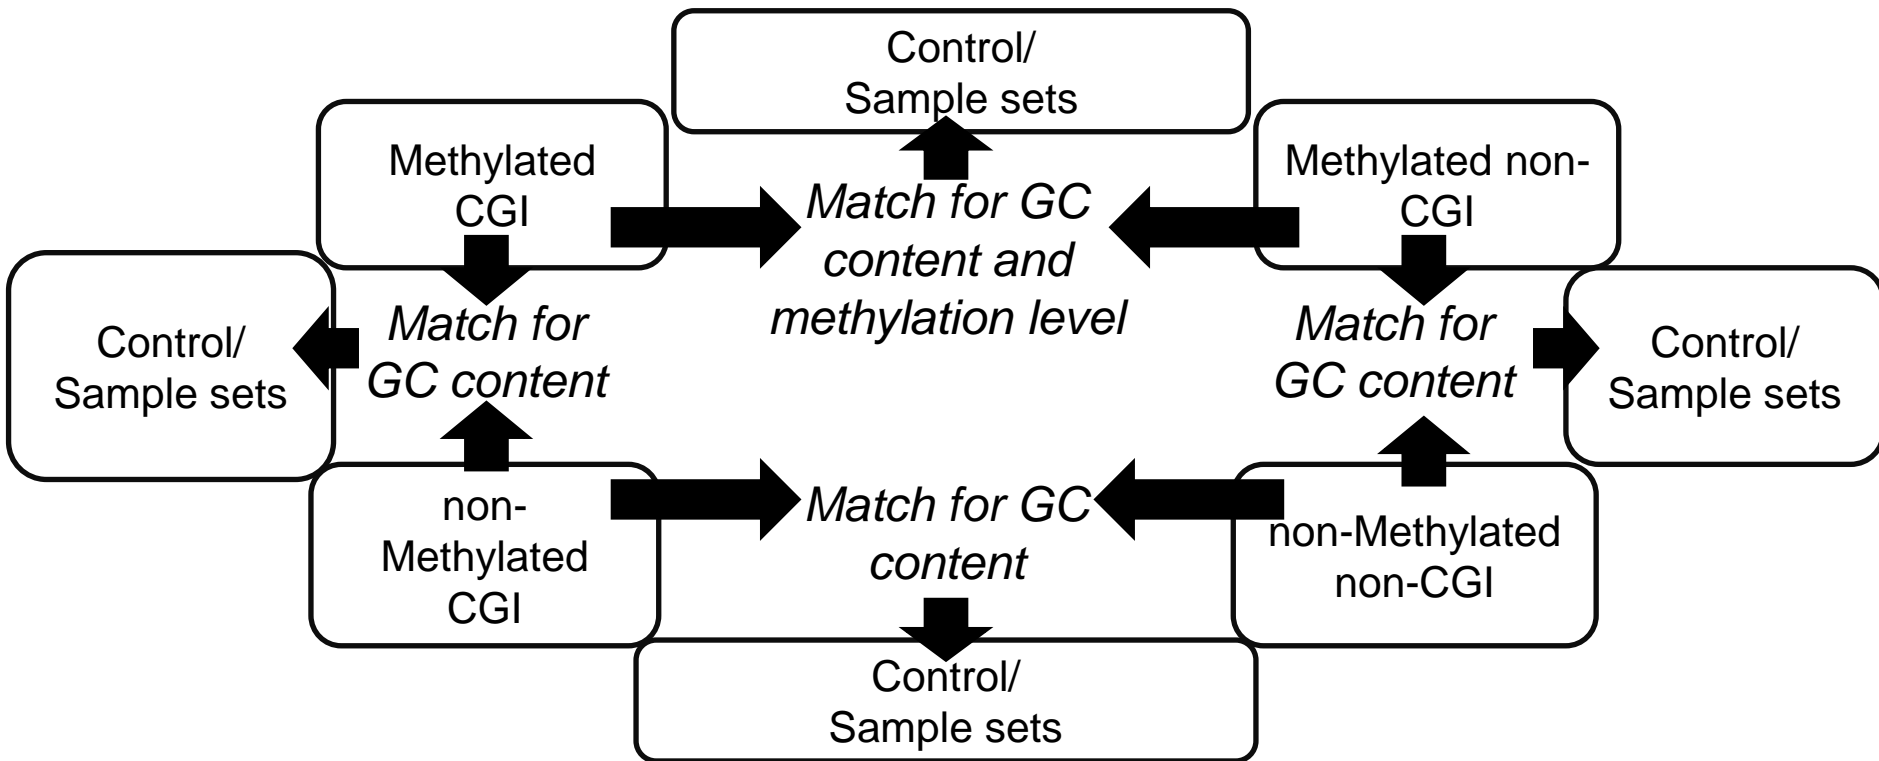

Supplement: 13062_2016_113_MOESM1_ESM.pdf [file 13062_2016_113_MOESM1_ESM.pdf]
